# Supplementary material for: Genome‐wide mosaicism in divergence between zoonotic malaria parasite subpopulations with separate sympatric transmission cycles
Source: PubMed Central journal article supplement (PMC5918592; doi:10.1111/mec.14477), 2018-02-13
Supplement: MEC-27-860-s001.pdf [file MEC-27-860-s001.pdf]

## Supporting Information

### **Genome-wide mosaicism in divergence between zoonotic malaria parasite subpopulations with separate sympatric transmission cycles**

Paul C. S. Divis<sup>1,2</sup>, Craig W. Duffy<sup>2</sup>, Khamisah A. Kadir<sup>1</sup>, Balbir Singh<sup>1</sup>, David J. Conway<sup>1,2</sup>

<sup>1</sup> Malaria Research Centre, Faculty of Medicine and Health Sciences, Universiti Malaysia Sarawak, 94300 Kota Samarahan, Sarawak, Malaysia,

<sup>2</sup> Pathogen Molecular Biology Department, London School of Hygiene and Tropical Medicine, Keppel St, London WC1E 7HT, United Kingdom.

Supporting Information for this paper consists of four figures (**Figures S1 – S4**) and four tables (**Tables S1 – S4**).

**Fig. S1.** SNP variation in whole genome sequences of *P. knowlesi* shows three major clusters by Principal Coordinate Analysis. The 21 new samples sequenced in this study are plotted with black dots (all are within Cluster 2) while previous genome sequences are indicated with grey dots.

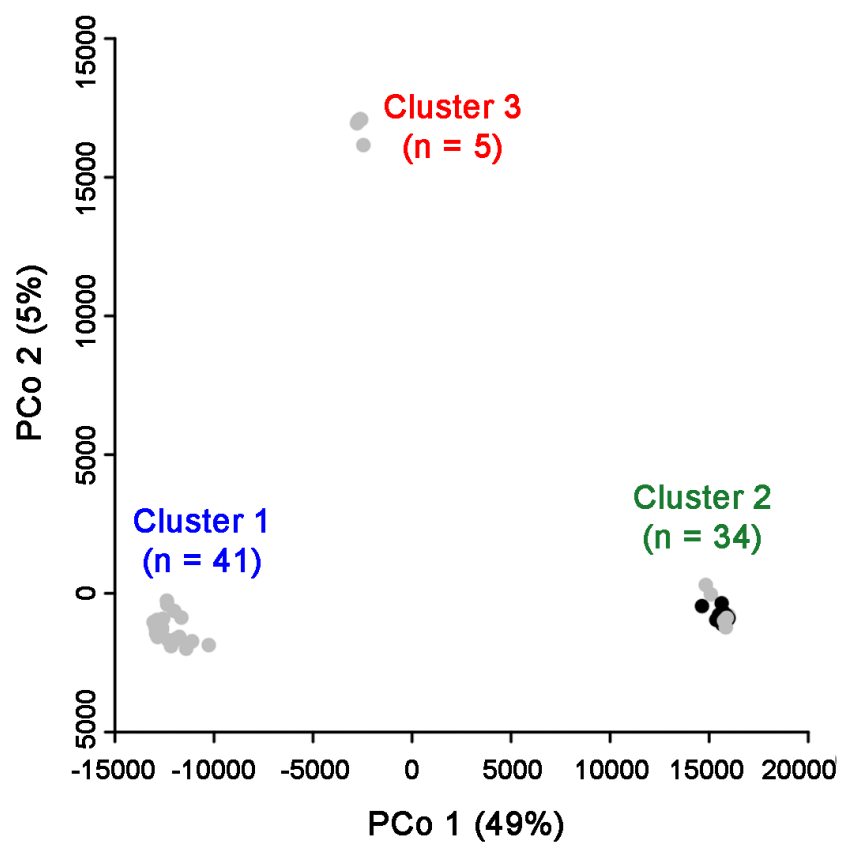

**Fig. S2.** Genome-wide distribution of nucleotide diversity ( $\pi$ ) of two *P. knowlesi* subpopulation clusters in Malaysian Borneo. (A) Cluster 1 subpopulation, and (B) Cluster 2 subpopulation. Diversity was calculated in non-overlapping 10-kb windows of all 14 chromosomes. Gap between chromosomal blocks represents subtelomeric regions and not included in analysis. The mean genome-wide  $\pi$  for Cluster 1 subpopulation ( $n = 41$ ) is  $5.78 \times 10^{-3}$  and for Cluster 2 subpopulation ( $n = 34$ ) is  $3.43 \times 10^{-3}$ .

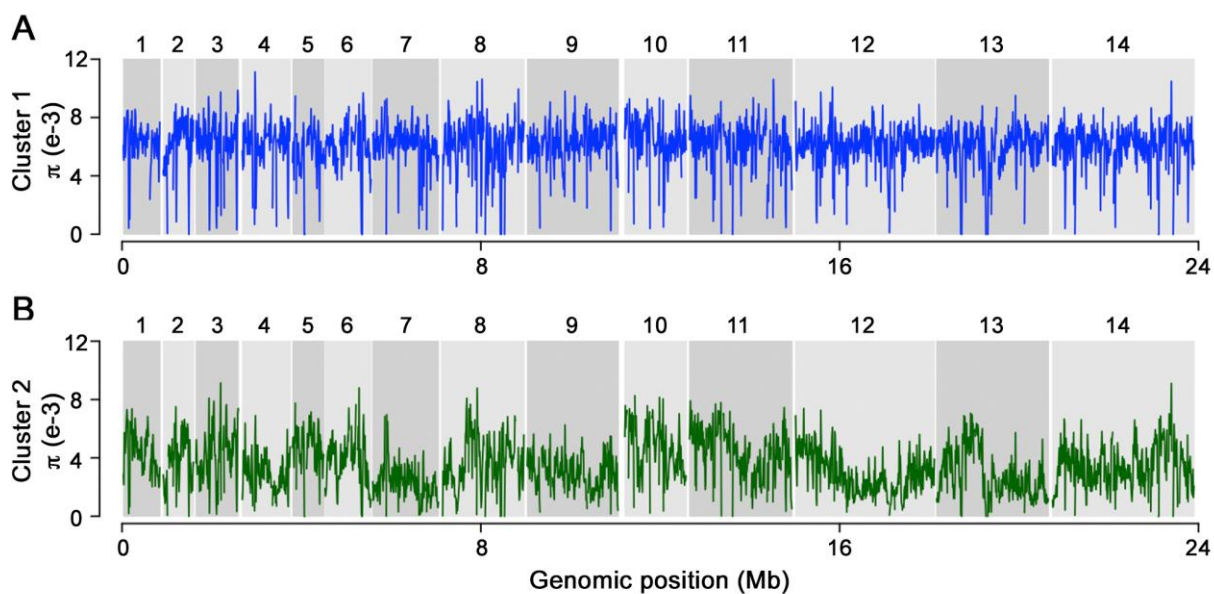

**Fig. S3.** Maximum Likelihood-based phylogeny inferred for mitochondrial genomes sequenced from 129 *P. knowlesi* isolates, including the samples sequenced in this study that are marked with underlined circles. Bootstrap values on nodes are only shown where they are above 80% based on 1000 replicates. The scale horizontal bar indicates nucleotide substitutions per site.

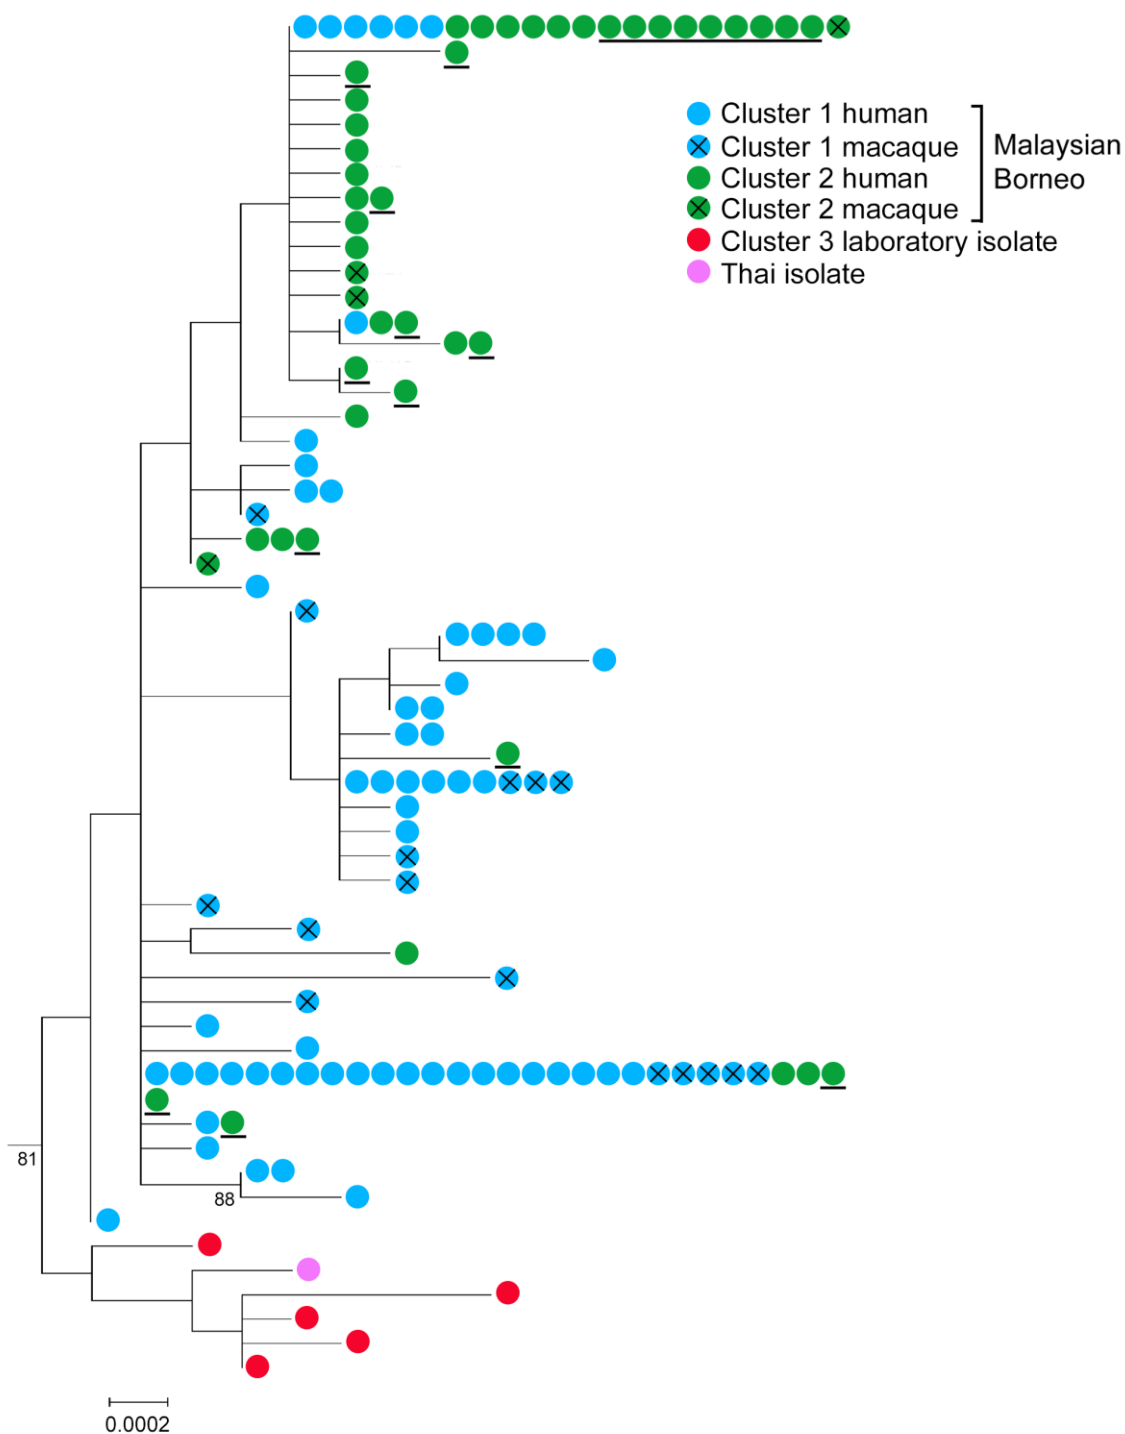

**Fig. S4.** Maximum likelihood phylogeny inferred by analysis of 30.6 kb of apicoplast genomes from 65 *P. knowlesi* infections, including the samples sequenced in this study that are marked with arrows. All nodes had bootstrap values above 80% based on 1000 replicates, except for those marked with black dots. The scale horizontal bar indicates nucleotide substitutions per site.

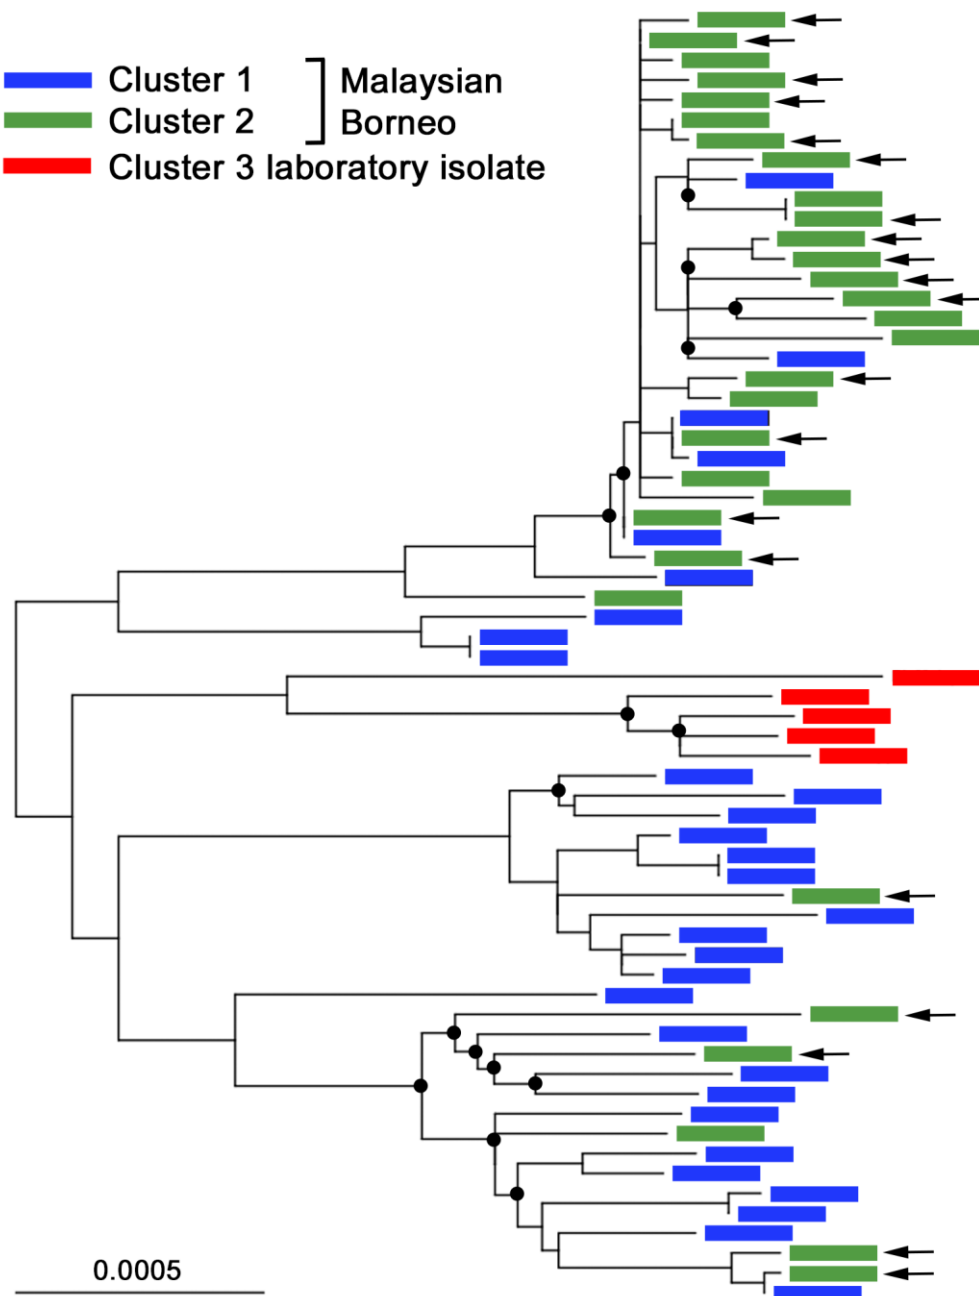

**Table S1.** Summary of remapping 59 previously generated short read sequences of *P. knowlesi* isolates against the version 2.0 reference genome.

| <b>Sample ID</b> | <b>QC-passed reads</b> | <b>% reads mapped</b> | <b>% read-pair mapped</b> | <b>Average depth coverage (X)</b> |
|------------------|------------------------|-----------------------|---------------------------|-----------------------------------|
| BTG026           | 41,313,779             | 96.04                 | 84.36                     | 146.64                            |
| BTG035           | 52,463,104             | 10.02                 | 8.27                      | 17.77                             |
| BTG039           | 45,761,870             | 79.59                 | 70.55                     | 134.72                            |
| BTG042           | 42,081,816             | 93.66                 | 81.97                     | 138.64                            |
| BTG044           | 29,325,669             | 97.40                 | 86.28                     | 106.17                            |
| BTG046           | 38,670,821             | 95.42                 | 83.46                     | 136.54                            |
| BTG047           | 32,277,653             | 95.26                 | 83.92                     | 113.71                            |
| BTG049           | 53,221,390             | 97.49                 | 85.81                     | 190.93                            |
| BTG050           | 33,519,780             | 94.01                 | 80.75                     | 115.50                            |
| BTG053           | 35,283,028             | 34.90                 | 30.03                     | 43.21                             |
| BTG055           | 21,829,275             | 77.64                 | 66.57                     | 59.30                             |
| BTG062           | 16,994,448             | 70.22                 | 57.78                     | 40.84                             |
| BTG063           | 24,682,482             | 62.87                 | 54.77                     | 54.42                             |
| BTG100           | 27,267,930             | 67.12                 | 58.67                     | 69.15                             |
| BTG123           | 25,430,647             | 89.20                 | 80.91                     | 86.82                             |
| CDK088           | 66,751,502             | 60.00                 | 53.24                     | 138.42                            |
| CDK206           | 38,122,706             | 35.21                 | 30.06                     | 46.09                             |
| KT003            | 42,777,884             | 17.76                 | 15.00                     | 27.47                             |
| KT004            | 42,025,428             | 92.31                 | 81.48                     | 146.56                            |
| KT006            | 60,281,143             | 92.74                 | 79.15                     | 211.51                            |
| KT012            | 22,442,197             | 95.63                 | 85.76                     | 81.86                             |
| KT025            | 56,208,103             | 94.16                 | 83.79                     | 201.71                            |
| KT026            | 33,338,952             | 83.74                 | 73.31                     | 105.78                            |
| KT027            | 52,853,787             | 92.96                 | 81.42                     | 187.58                            |
| KT029            | 28,872,280             | 62.58                 | 54.37                     | 68.46                             |
| KT030            | 28,525,157             | 90.61                 | 78.79                     | 98.13                             |
| KT031            | 50,367,159             | 90.81                 | 81.98                     | 173.76                            |
| KT034            | 23,838,990             | 53.04                 | 46.11                     | 47.20                             |
| KT040            | 30,655,543             | 97.60                 | 86.47                     | 113.01                            |
| KT042            | 28,468,946             | 95.15                 | 86.27                     | 103.16                            |
| KT048            | 20,775,707             | 77.46                 | 68.02                     | 60.40                             |
| KT050            | 19,424,602             | 93.49                 | 82.97                     | 68.46                             |
| KT055            | 46,135,860             | 90.10                 | 84.64                     | 156.67                            |
| KT056            | 48,992,338             | 81.75                 | 76.99                     | 151.34                            |
| KT057            | 45,715,366             | 92.63                 | 85.97                     | 159.30                            |
| KT072            | 45,016,497             | 95.70                 | 88.65                     | 161.03                            |
| KT073            | 46,334,104             | 95.13                 | 88.03                     | 164.87                            |
| KT077            | 26,284,061             | 95.29                 | 86.43                     | 95.54                             |
| KT081            | 28,061,976             | 95.01                 | 86.35                     | 101.66                            |
| KT092            | 26,779,552             | 96.35                 | 87.61                     | 98.40                             |

|                |            |       |       |        |
|----------------|------------|-------|-------|--------|
| KT094          | 29,726,016 | 97.46 | 88.18 | 110.38 |
| KT095          | 26,349,673 | 96.90 | 87.82 | 97.27  |
| KT100          | 24,359,451 | 97.65 | 88.17 | 90.80  |
| KT103          | 22,730,860 | 97.59 | 88.17 | 84.31  |
| KT107          | 30,273,348 | 94.21 | 85.17 | 108.66 |
| KT109          | 26,247,181 | 96.40 | 87.09 | 96.43  |
| KT114          | 24,462,899 | 88.82 | 81.43 | 83.28  |
| KT120          | 20,937,609 | 79.02 | 71.65 | 63.15  |
| SKS047         | 6,249,430  | 94.99 | 76.20 | 32.62  |
| SKS048         | 44,612,191 | 97.59 | 86.07 | 165.11 |
| SKS050A        | 57,817,253 | 98.31 | 86.79 | 215.82 |
| SKS058         | 40,794,756 | 97.63 | 87.74 | 152.48 |
| SKS073         | 6,378,060  | 97.36 | 81.60 | 34.48  |
| SKS299         | 51,056,847 | 97.64 | 87.24 | 190.48 |
| Pk_Hackeri     | 20,636,601 | 96.47 | 90.28 | 74.96  |
| Pk_Malayan     | 16,464,035 | 87.42 | 86.12 | 55.99  |
| Pk_MR4H        | 20,571,229 | 77.39 | 72.99 | 59.00  |
| Pk_Nuri        | 23,348,408 | 97.30 | 91.52 | 90.08  |
| Pk_Philippines | 32,660,672 | 97.40 | 92.16 | 85.40  |

---

**Table S2.** Definition of the *P. knowlesi* subtelomeric regions excluded from analysis

| <b>Chromosome</b> | <b>Left subtelomeric region<br/>End position (GeneID*)</b> | <b>Right subtelomeric region<br/>Start position (GeneID)</b> |
|-------------------|------------------------------------------------------------|--------------------------------------------------------------|
| 1 PKNH_01_v2      | 31756 (PKNH_0100600)                                       | 851582 (PKNH_0118200)                                        |
| 2 PKNH_02_v2      | 39903 (PKNH_0200500)                                       | 717562 (PKNH_0216200)                                        |
| 3 PKNH_03_v2      | 40085 (PKNH_0300900)                                       | 984128 (PKNH_0321700)                                        |
| 4 PKNH_04_v2      | 45677 (PKNH_0400700)                                       | 1111994 (PKNH_0424800)                                       |
| 5 PKNH_05_v2      | 40025 (PKNH_0500100)                                       | 735661 (PKNH_0516400)                                        |
| 6 PKNH_06_v2      | 19789 (PKNH_0600400)                                       | 1045508 (PKNH_0623600)                                       |
| 7 PKNH_07_v2      | 9141 (PKNH_0700200)                                        | 1485805 (PKNH_0734800)                                       |
| 8 PKNH_08_v2      | 17009 (PKNH_0800400)                                       | 1874898 (PKNH_0841200)                                       |
| 9 PKNH_09_v2      | 56545 (PKNH_0900600)                                       | 2085215 (PKNH_0945900)                                       |
| 10 PKNH_10_v2     | 69857 (PKNH_1001300)                                       | 1439673 (PKNH_1032500)                                       |
| 11 PKNH_11_v2     | 29067 (PKNH_1100500)                                       | 2317969 (PKNH_1149400)                                       |
| 12 PKNH_12_v2     | 38750 (PKNH_1200400)                                       | 3129934 (PKNH_1272100)                                       |
| 13 PKNH_13_v2     | 24663 (PKNH_1300400)                                       | 2519037 (PKNH_1356400)                                       |
| 14 PKNH_14_v2     | 46265 (PKNH_1401100)                                       | 3204808 (PKNH_1472800)                                       |

\*GeneIDs refer to the first and the last conserved protein-coding genes at each chromosome subtelomere boundary. These and the coordinates refer to version 2.0 of the *P. knowlesi* H strain genome sequence.



**Table S3.** Summary of mapping the short read sequences of 21 new isolates against the *P. knowlesi* version 2.0 reference genome.

| Sample ID | QC-passed reads | % reads mapped | % read-pair mapped | Mean depth coverage (X) | Sequence Accession |
|-----------|-----------------|----------------|--------------------|-------------------------|--------------------|
| KT133     | 8,162,583       | 97.83          | 79.73              | 68.43                   | ERSXXXXXX          |
| KT143     | 5,856,181       | 92.50          | 76.18              | 46.80                   | ERSXXXXXX          |
| KT147     | 4,169,555       | 80.77          | 66.14              | 28.66                   | ERSXXXXXX          |
| KT151     | 10,010,749      | 80.95          | 65.17              | 68.03                   | ERSXXXXXX          |
| KT161     | 10,544,255      | 65.18          | 53.45              | 56.19                   | ERSXXXXXX          |
| KT165     | 8,134,708       | 95.69          | 78.58              | 67.36                   | ERSXXXXXX          |
| KT172     | 7,953,445       | 64.71          | 52.08              | 42.17                   | ERSXXXXXX          |
| KT176     | 5,854,135       | 98.42          | 81.19              | 50.11                   | ERSXXXXXX          |
| KT186     | 9,092,261       | 95.21          | 78.00              | 74.47                   | ERSXXXXXX          |
| KT198     | 7,072,188       | 98.30          | 82.09              | 50.96                   | ERSXXXXXX          |
| KT217     | 8,827,711       | 85.51          | 69.74              | 64.04                   | ERSXXXXXX          |
| KT221     | 6,138,392       | 97.72          | 80.20              | 51.73                   | ERSXXXXXX          |
| KT223     | 7,584,970       | 97.07          | 79.87              | 63.69                   | ERSXXXXXX          |
| KT224     | 10,403,400      | 90.68          | 74.10              | 80.27                   | ERSXXXXXX          |
| KT226     | 7,057,397       | 94.60          | 77.89              | 50.92                   | ERSXXXXXX          |
| KT231     | 3,468,323       | 97.98          | 80.38              | 28.99                   | ERSXXXXXX          |
| KT233     | 5,224,563       | 97.59          | 79.88              | 44.10                   | ERSXXXXXX          |
| KT243     | 9,500,408       | 98.33          | 81.53              | 71.51                   | ERSXXXXXX          |
| KT263     | 4,012,790       | 96.38          | 79.36              | 33.64                   | ERSXXXXXX          |
| KT266     | 6,897,861       | 98.00          | 81.77              | 47.88                   | ERSXXXXXX          |
| KT305     | 3,628,341       | 96.37          | 78.70              | 30.26                   | ERSXXXXXX          |

All sequence accession numbers will be made publicly available upon acceptance of the article.

**Table S4.** Locations and lengths of high divergence regions (HDRs) and low divergence regions (LDRs) in 14 chromosomes of *P. knowlesi*

| Chr | High-diverged regions (HDRs) |                |              |             | Low-diverged regions (LDRs) |                |              |             |
|-----|------------------------------|----------------|--------------|-------------|-----------------------------|----------------|--------------|-------------|
|     | HDR window                   | Start position | End position | Length (bp) | LDR window                  | Start position | End position | Length (bp) |
| 1   | HDR01                        | 749494         | 837835       | 88342       | LDR01                       | 96319          | 679406       | 583088      |
| 2   | HDR02                        | 40006          | 180420       | 140415      | LDR02                       | 186366         | 364472       | 178107      |
|     |                              |                |              |             | LDR03                       | 425017         | 648577       | 238648      |
| 3   |                              |                |              |             | LDR04                       | 252738         | 460344       | 207607      |
|     |                              |                |              |             | LDR05                       | 546998         | 937541       | 390544      |
| 4   | HDR03                        | 625263         | 919357       | 294095      | LDR06                       | 234546         | 421831       | 187286      |
| 5   |                              |                |              |             | LDR07                       | 40804          | 733264       | 692461      |
| 6   | HDR04                        | 21165          | 112965       | 91801       | LDR08                       | 318443         | 864442       | 546000      |
|     | HDR05                        | 921498         | 1024278      | 102781      |                             |                |              |             |
| 7   | HDR06                        | 23701          | 222469       | 198769      |                             |                |              |             |
|     | HDR07                        | 397684         | 853275       | 455592      |                             |                |              |             |
|     | HDR08                        | 860949         | 1452166      | 591218      |                             |                |              |             |
| 8   | HDR09                        | 26256          | 190875       | 164620      | LDR09                       | 534591         | 1827275      | 1292685     |
|     | HDR10                        | 260538         | 533984       | 273447      |                             |                |              |             |
| 9   | HDR11                        | 1316694        | 1754323      | 437630      | LDR10                       | 765850         | 945549       | 179700      |
| 10  |                              |                |              |             | LDR11                       | 70745          | 338054       | 267310      |
|     |                              |                |              |             | LDR12                       | 481963         | 1003531      | 521569      |
|     |                              |                |              |             | LDR13                       | 1067530        | 1385663      | 318134      |
| 11  | HDR12                        | 1570780        | 1676811      | 106032      | LDR14                       | 30861          | 1117021      | 1086161     |
|     |                              |                |              |             | LDR15                       | 1326585        | 1507915      | 181331      |
|     |                              |                |              |             | LDR16                       | 1681406        | 2194542      | 513137      |
| 12  | HDR13                        | 1165069        | 1935432      | 770364      | LDR17                       | 39358          | 729445       | 690088      |
|     | HDR14                        | 1951856        | 2524953      | 573098      |                             |                |              |             |
|     | HDR15                        | 2590082        | 2849921      | 259840      |                             |                |              |             |
| 13  | HDR16                        | 24680          | 146791       | 122112      | LDR18                       | 147119         | 324956       | 177838      |
|     | HDR17                        | 1053698        | 2514922      | 1461225     | LDR19                       | 515520         | 1017446      | 501927      |
| 14  | HDR18                        | 46282          | 200282       | 154001      | LDR20                       | 207562         | 441315       | 233754      |
|     | HDR19                        | 743011         | 915540       | 172530      | LDR21                       | 1036448        | 1221194      | 266306      |

|       |         |         |       |       |         |         |        |
|-------|---------|---------|-------|-------|---------|---------|--------|
| HDR20 | 3103808 | 3186756 | 82949 | LDR22 | 1363873 | 1539047 | 175175 |
|       |         |         |       | LDR23 | 2280342 | 2888810 | 608469 |

---

HDRs are regions with contiguously high  $F_{ST}$  indices between Cluster 1 and Cluster 2 (Z scores of multiple windows containing 500 adjacent SNPs all above 0.5); LDRs are regions with contiguously low  $F_{ST}$  indices (Z scores of multiple windows all below -0.5).
